# Supplementary material for: Synthesis and structural diversity of d10 metal coordination polymers constructed from new semi-rigid bis(3-methyl-1H-pyrazole-4-carboxylic acid)alkane ligands
Source: Royal Society of Chemistry journal article supplement (doi:10.1039/c7nj00835j), 2017-01-01
Supplement: c7nj00835j1.pdf [file c7nj00835j1.pdf]

## Electronic Supplementary Information (ESI)

# Synthesis and Structural Diversity of $d^{10}$ Metal Coordination Polymers Constructed from New Semirigid Bis(3-methyl-1H-pyrazole-4-carboxylic acid)alkane Ligands

Meiling Cheng,<sup>a</sup> Qinghua Wang,<sup>a</sup> Jinting Bao,<sup>a</sup> Yujuan Wu,<sup>a</sup> Lin Sun,<sup>a</sup> Bingxin Yang,<sup>a</sup> Qi Liu,<sup>\*ab</sup>

<sup>a</sup>School of Petrochemical Engineering and Jiangsu Key Laboratory of Advanced Catalytic  
Materials and Technology, Changzhou University, Changzhou 213164, P. R. China

<sup>b</sup>State Key Laboratory of Coordination Chemistry, Nanjing University, Nanjing, Jiangsu 210093, P.  
R. China

E-mail: liuqi62@163.com.

## Table of Contents

|                                                                                                                                                                                                                                                                                                                                                                                                                                                                                                       |    |
|-------------------------------------------------------------------------------------------------------------------------------------------------------------------------------------------------------------------------------------------------------------------------------------------------------------------------------------------------------------------------------------------------------------------------------------------------------------------------------------------------------|----|
| Figure S1 (a) The 1D chainlike structure of <b>2b</b> . (b) The 3D supramolecular network of <b>H<sub>2</sub>L<sup>1</sup></b> . (c) The 2D supramolecular structure of <b>H<sub>2</sub>L<sup>2</sup></b> . The hydrogen atoms not involved in hydrogen bonds are omitted for clarity. Hydrogen bonds are indicated by dashed line. ....                                                                                                                                                              | S3 |
| Figure S2 2D layers constructed by C–H···O hydrogen bonds in <b>3a</b> (a) and <b>3b</b> (b). The hydrogen atoms not involved in hydrogen bonds are omitted for clarity. Hydrogen bonds are indicated by dashed lines. ....                                                                                                                                                                                                                                                                           | S3 |
| Figure S3 The 3D supramolecular structure of complex <b>4</b> viewing along the <i>a</i> -axis. The hydrogen atoms not involved in hydrogen bonds are omitted for clarity. Hydrogen bonds are indicated by dashed lines. ....                                                                                                                                                                                                                                                                         | S3 |
| Figure S4 (a) The distorted monocapped triangular prismatic geometry of Cd(II) in complex <b>6</b> . Symmetry code: A: 1 – <i>x</i> , 1/2 + <i>y</i> , 3/2 – <i>z</i> ; B: – <i>x</i> , 1/2 + <i>y</i> , 3/2 – <i>z</i> ; C: 2 – <i>x</i> , 1/2 + <i>y</i> , 3/2 – <i>z</i> . (b) The 3D supramolecular structure of complex <b>6</b> viewing along the <i>c</i> -axis. The hydrogen atoms not involved in hydrogen bonds are omitted for clarity. Hydrogen bonds are indicated by dashed lines. .... | S4 |
| Figure S5. The PXRD Patterns of CPs <b>3–6</b> . ....                                                                                                                                                                                                                                                                                                                                                                                                                                                 | S4 |
| Figure S6 The TG-traces for CPs <b>3–6</b> . ....                                                                                                                                                                                                                                                                                                                                                                                                                                                     | S5 |
| Figure S7 Solid-state emission spectra for ligands <b>H<sub>2</sub>L<sup>1</sup></b> , <b>H<sub>2</sub>L<sup>2</sup></b> , CPs <b>3</b> , <b>4</b> ( $\lambda_{\text{ex}} = 220$ nm), and <b>5</b> , <b>6</b> ( $\lambda_{\text{ex}} = 224$ nm) at room temperature. ....                                                                                                                                                                                                                             | S5 |
| Table S1 Selected bond lengths (Å) and angles (°) in <b>2b</b> , <b>H<sub>2</sub>L<sup>1</sup></b> , <b>H<sub>2</sub>L<sup>2</sup></b> and CPs <b>3–6</b> . ....                                                                                                                                                                                                                                                                                                                                      | S6 |
| Table S2 Hydrogen bond distances (Å) and angles (°) in <b>2b</b> , <b>H<sub>2</sub>L<sup>1</sup></b> , <b>H<sub>2</sub>L<sup>2</sup></b> and CPs <b>3–6</b> . ....                                                                                                                                                                                                                                                                                                                                    | S8 |

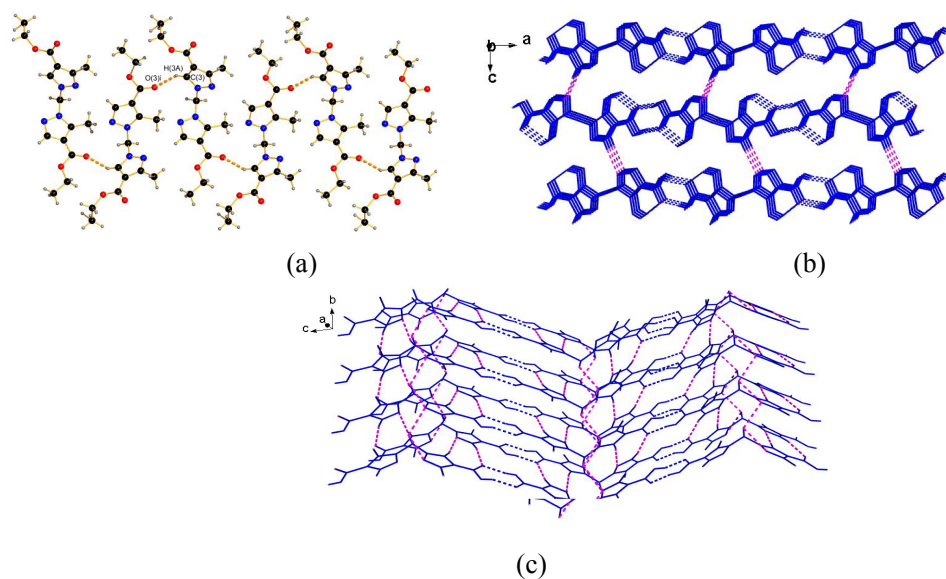

Figure S1 (a) The 1D chainlike structure of **2b**. (b) The 3D supramolecular network of **H<sub>2</sub>L<sup>1</sup>**. (c) The 2D supramolecular structure of **H<sub>2</sub>L<sup>2</sup>**. The hydrogen atoms not involved in hydrogen bonds are omitted for clarity. Hydrogen bonds are indicated by dashed line.

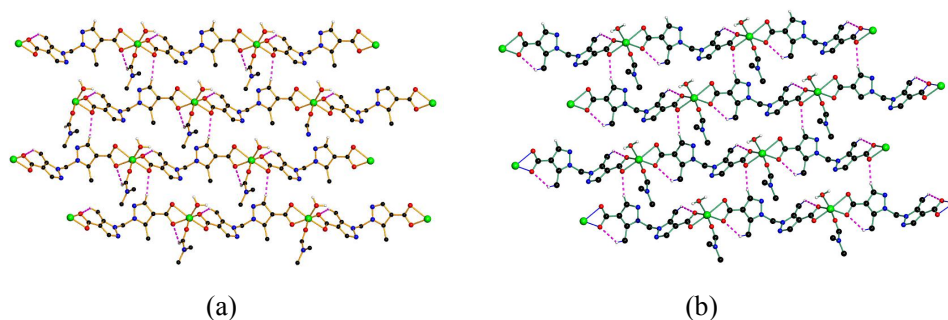

Figure S2 2D layers constructed by C–H···O hydrogen bonds in **3a** (a) and **3b** (b). The hydrogen atoms not involved in hydrogen bonds are omitted for clarity. Hydrogen bonds are indicated by dashed lines.

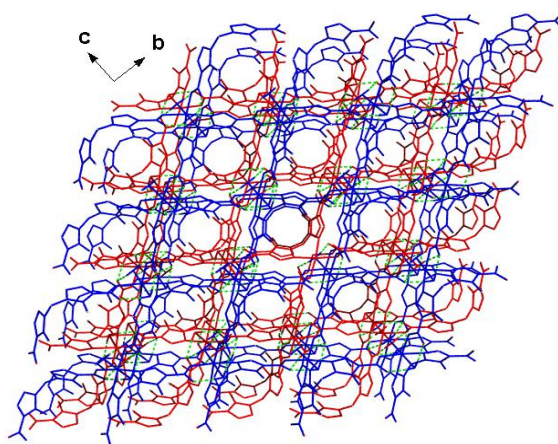

Figure S3 The 3D supramolecular structure of complex **4** viewing along the *a*-axis. The hydrogen atoms not involved in hydrogen bonds are omitted for clarity. Hydrogen bonds are indicated by dashed lines.

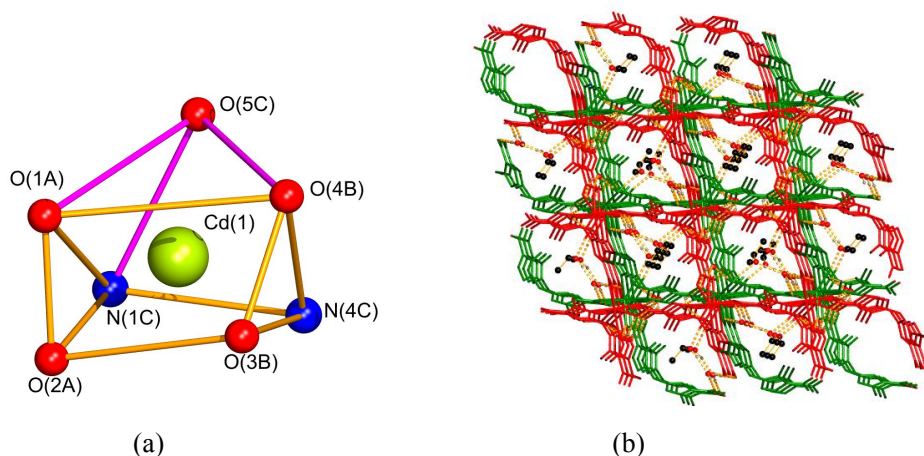

Figure S4 (a) The distorted monocapped triangular prismatic geometry of Cd(II) in complex **6**. Symmetry code: A:  $1 - x, 1/2 + y, 3/2 - z$ ; B:  $-x, 1/2 + y, 3/2 - z$ ; C:  $2 - x, 1/2 + y, 3/2 - z$ . (b) The 3D supramolecular structure of complex **6** viewing along the *c*-axis. The hydrogen atoms not involved in hydrogen bonds are omitted for clarity. Hydrogen bonds are indicated by dashed lines.

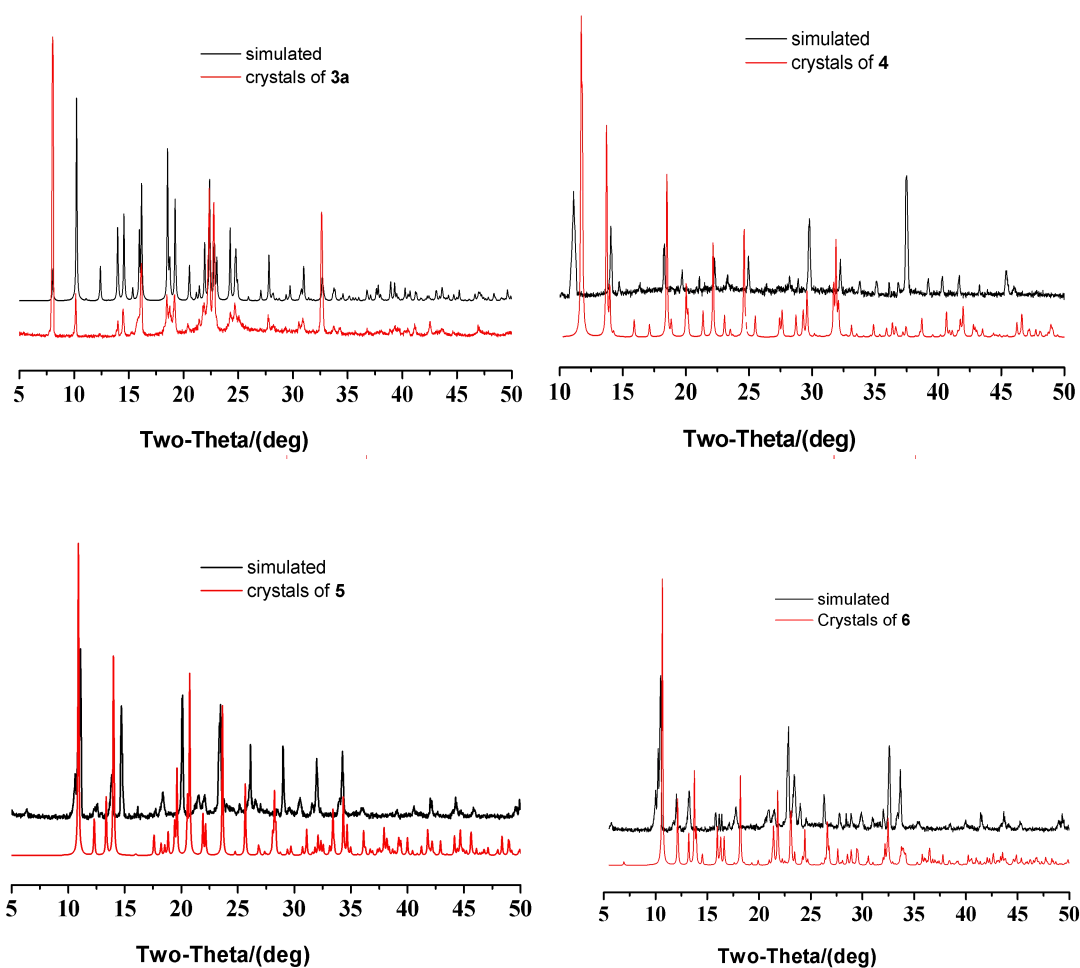

Figure S5. The PXR D Patterns of CPs **3–6**.

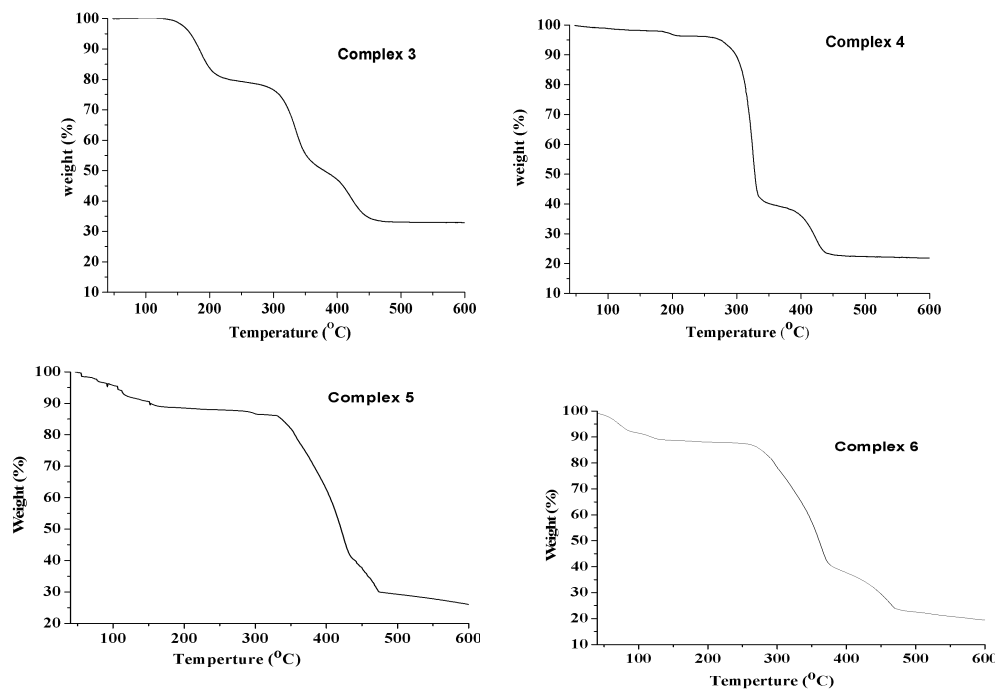

Figure S6 The TG-traces for CPs 3–6.

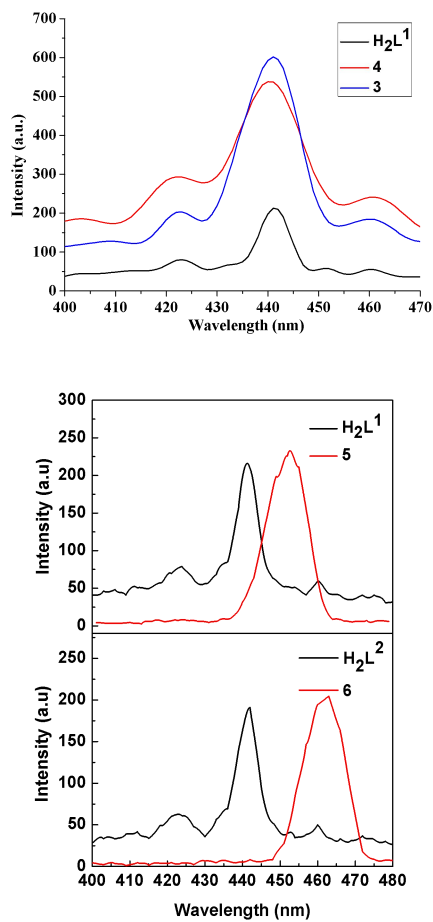

Figure S7 Solid-state emission spectra for ligands  $\text{H}_2\text{L}^1$ ,  $\text{H}_2\text{L}^2$ , CPs 3, 4 ( $\lambda_{\text{ex}} = 220$  nm), and 5, 6 ( $\lambda_{\text{ex}} = 224$  nm) at room temperature.

Table S1 Selected bond lengths (Å) and angles (°) in **2b**, **H<sub>2</sub>L<sup>1</sup>**, **H<sub>2</sub>L<sup>2</sup>** and CPs **3–6**.

|                                                |            |                     |           |
|------------------------------------------------|------------|---------------------|-----------|
| <b>2b</b>                                      |            |                     |           |
| C(5)–O(1)                                      | 1.210(4)   | C(5)–O(2)           | 1.330(4)  |
| C(13)–O(3)                                     | 1.210(3)   | C(13)–O(4)          | 1.326(3)  |
| N(1)–N(2)                                      | 1.366(3)   | N(3)–N(4)           | 1.368(3)  |
| C(8)–N(1)                                      | 1.448(3)   | C(8)–N(3)           | 1.446(3)  |
| O(1)–C(5)–O(2)                                 | 122.3(4)   | O(3)–C(13)–O(4)     | 123.3(2)  |
| N(3)–C(8)–N(1)                                 | 112.5(2)   |                     |           |
| <b>H<sub>2</sub>L<sup>1</sup></b>              |            |                     |           |
| C(2)–N(2)                                      | 1.362(6)   | C(4)–O(1)           | 1.235(6)  |
| C(4)–O(2)                                      | 1.300(6)   | C(5)–N(1)           | 1.324(6)  |
| C(6)–N(2)                                      | 1.443(6)   | C(6)–N(3)           | 1.453(6)  |
| C(8)–N(3)                                      | 1.361(6)   | C(10)–O(4)          | 1.241(7)  |
| C(10)–O(3)                                     | 1.296(7)   | C(11)–N(4)          | 1.320(6)  |
| N(1)–N(2)                                      | 1.360(6)   | N(3)–N(4)           | 1.360(6)  |
| O(2)–C(4)–O(1)                                 | 123.1(4)   | O(4)–C(10)–O(3)     | 123.5(4)  |
| N(3)–C(6)–N(2)                                 | 112.4(3)   |                     |           |
| <b>H<sub>2</sub>L<sup>2</sup></b>              |            |                     |           |
| C(4)–O(2)                                      | 1.248(3)   | C(4)–O(1)           | 1.297(3)  |
| C(10)–O(4)                                     | 1.241(3)   | C(10)–O(3)          | 1.287(3)  |
| C(6)–N(3)                                      | 1.436(3)   | C(6)–N(2)           | 1.445(3)  |
| N(1)–N(2)                                      | 1.369(3)   | N(3)–N(4)           | 1.369(2)  |
| O(2)–C(4)–O(1)                                 | 122.7(2)   | O(4)–C(10)–O(3)     | 124.0(2)  |
| N(3)–C(6)–N(2)                                 | 113.0(2)   |                     |           |
| <b>3a</b>                                      |            |                     |           |
| Zn(1)–O(1)                                     | 2.0882(19) | Zn(1)–O(2)          | 2.255(2)  |
| Zn(1)#1–O(3)                                   | 2.385(2)   | Zn(1)#1–O(4)        | 2.033(2)  |
| Zn(1)–O(5)                                     | 2.073(2)   | Zn(1)–O(6)          | 1.995(2)  |
| Zn(1)–O(3)#2                                   | 2.385(2)   | Zn(1)–O(4)#2        | 2.033(2)  |
| O(6)–Zn(1)–O(4)#2                              | 145.58(8)  | O(5)–Zn(1)–O(6)     | 93.41(9)  |
| O(4)#2–Zn(1)–O(5)                              | 91.78(10)  | O(6)–Zn(1)–O(1)     | 98.31(8)  |
| O(4)#2–Zn(1)–O(1)                              | 115.86(8)  | O(5)–Zn(1)–O(1)     | 88.21(9)  |
| O(5)–Zn(1)–O(2)                                | 99.13(9)   | O(3)#2–Zn(1)–O(2)   | 94.69(9)  |
| O(5)–Zn(1)–O(2)                                | 147.05(9)  | O(1)–Zn(1)–O(2)     | 59.97(7)  |
| O(6)–Zn(1)–O(3)#                               | 87.68(7)   | O(4)#2–Zn(1)–O(3)#2 | 58.50(8)  |
| O(5)–Zn(1)–O(3)#2                              | 108.43(9)  | O(1)–Zn(1)–O(3)#2   | 162.04(8) |
| O(2)–Zn(1)–O(3)#2                              | 102.45(8)  | N(2)–C(6)–N(3)      | 110.7(2)° |
| #1: $x + 1, y + 1, z$ ; #2 $x - 1, y - 1, z$ . |            |                     |           |
| <b>3b</b>                                      |            |                     |           |
| Zn(1)–O(6)                                     | 1.950(4)   | Zn(1)#1–O(4)        | 2.041(4)  |
| Zn(1)–O(5)                                     | 2.047(4)   | Zn(1)–O(1)          | 2.128(4)  |
| Zn(1)–O(2)                                     | 2.257(4)   | Zn(1)#1–O(3)        | 2.318(4)  |

|                                                                                             |            |                     |            |
|---------------------------------------------------------------------------------------------|------------|---------------------|------------|
| O(6)–Zn(1)–O(4)#1                                                                           | 145.54(15) | O(6)–Zn(1)–O(5)     | 90.57(17)  |
| O(4)#2–Zn(1)–O(5)                                                                           | 91.85(17)  | O(6)–Zn(1)–O(1)     | 97.77(15)  |
| O(4)#2–Zn(1)–O(1)                                                                           | 116.65(16) | O(5)–Zn(1)–O(1)     | 88.50(16)  |
| O(6)–Zn(1)–O(2)                                                                             | 100.09(16) | O(4)#1–Zn(1)–O(2)   | 95.05(16)  |
| O(5)–Zn(1)–O(2)                                                                             | 149.43(16) | O(1)–Zn(1)–O(2)     | 61.84(14)  |
| O(6)–Zn(1)–O(3)#1                                                                           | 87.71(14)  | O(4)#2–Zn(1)–O(3)#1 | 59.08(14)  |
| O(5)–Zn(1)–O(3)#1                                                                           | 108.87(16) | O(1)–Zn(1)–O(3)#1   | 161.80(15) |
| O(2)–Zn(1)–O(3)#1                                                                           | 100.17(15) | N(2)–C(6)–N(3)      | 110.9(4)   |
| #1: $x - 1, y + 1, z$ .                                                                     |            |                     |            |
| <b>4</b>                                                                                    |            |                     |            |
| Zn(1)–O(1)                                                                                  | 2.090(3)   | Zn(1)–N(1)#1        | 2.199(3)   |
| Zn(1)–O(3)                                                                                  | 2.105(4)   | Zn(1)–O(4)          | 2.082(4)   |
| O(4)–Zn(1)–O(1)                                                                             | 93.11(12)  | O(1)#2–Zn(1)–O(1)   | 97.12(19)  |
| O(4)–Zn(1)–O(3)                                                                             | 178.23(18) | O(1)–Zn(1)–O(3)     | 85.72(12)  |
| O(4)–Zn(1)–N(1)#1                                                                           | 87.41(14)  | O(1)–Zn(1)–N(1)#1   | 173.44(13) |
| O(1)#2–Zn(1)–N(1)#1                                                                         | 89.39(13)  | O(3)–Zn(1)–N(1)#1   | 93.91(14)  |
| N(1)#1–Zn(1)–N(1)#3                                                                         | 84.10(18)  | N(2)–C(6)–N(2)#2    | 110.8(5)   |
| #1: $-x + 1/2, y - 1/2, z - 1/2$ ; #2: $x, -y + 3/2, z$ ; #3: $-x + 1/2, -y + 2, z - 1/2$ . |            |                     |            |
| <b>5</b>                                                                                    |            |                     |            |
| Cd(1)–O(1)#1                                                                                | 2.276(2)   | Cd(1)–O(4)#2        | 2.277(2)   |
| Cd(1)–O(5)                                                                                  | 2.294(2)   | Cd(1)–N(4)          | 2.303(2)   |
| Cd(1)–O(2)#1                                                                                | 2.423(2)   | Cd(1)–N(1)          | 2.444(2)   |
| O(1)#1–Cd(1)–O(4)#2                                                                         | 107.19(8)  | O(1)#1–Cd(1)–O(5)   | 89.69(8)   |
| O(4)#2–Cd(1)–O(5)                                                                           | 93.24(8)   | O(1)#1–Cd(1)–N(4)   | 160.83(8)  |
| O(4)#2–Cd(1)–N(4)                                                                           | 91.87(8)   | O(5)–Cd(1)–N(4)     | 87.16(8)   |
| O(1)#1–Cd(1)–O(2)#1                                                                         | 55.45(8)   | O(4)#2–Cd(1)–O(2)#1 | 88.17(7)   |
| O(5)–Cd(1)–O(2)#1                                                                           | 143.54(8)  | N(4)–Cd(1)–O(2)#1   | 129.24(8)  |
| O(1A)–Cd(1)–N(1)                                                                            | 82.27(8)   | O(4)#2–Cd(1)–N(1)   | 159.98(8)  |
| O(5)–Cd(1)–N(1)                                                                             | 104.62(8)  | N(4)–Cd(1)–N(1)     | 80.26(8)   |
| O(2)#1–Cd(1)–N(1)                                                                           | 82.82(8)   | N(2)–C(6)–N(3)      | 111.2(2)   |
| #1 $-x + 1, y + 1/2, -z + 3/2$ ; #2 $-x + 1, y + 1/2, -z + 5/2$ .                           |            |                     |            |
| <b>6</b>                                                                                    |            |                     |            |
| Cd(1)–O(5)                                                                                  | 2.2977(16) | Cd(1)–O(1)#1        | 2.3267(15) |
| Cd(1)–N(4)                                                                                  | 2.3497(17) | Cd(1)–O(3)#2        | 2.3727(16) |
| Cd(1)–N(1)                                                                                  | 2.4498(15) | Cd(1)–O(2)#1        | 2.4505(14) |
| Cd(1)–O(4)#2                                                                                | 2.4536(16) | O(5)–Cd(1)–O(1)#1   | 92.35(6)   |
| O(5)–Cd(1)–N(4)                                                                             | 93.09(7)   | O(1)#1–Cd(1)–N(4)   | 172.84(6)  |
| O(5)–Cd(1)–O(3)#2                                                                           | 133.96(6)  | O(1)#1–Cd(1)–O(3)#2 | 95.56(6)   |
| N(4)–Cd(1)–O(3)#2                                                                           | 83.99(6)   | O(5)–Cd(1)–N(1)     | 84.15(6)   |
| O(1)#1–Cd(1)–N(1)                                                                           | 97.43(5)   | N(4)–Cd(1)–N(1)     | 78.51(6)   |
| O(3)#2–Cd(1)–N(1)                                                                           | 138.99(6)  | O(5)–Cd(1)–O(2)#1   | 137.84(6)  |
| O(1)#1–Cd(1)–O(2)#1                                                                         | 54.73(5)   | N(4)–Cd(1)–O(2)#1   | 118.25(6)  |
| O(3)#2–Cd(1)–O(2)#1                                                                         | 80.17(5)   | N(1)–Cd(1)–O(2)#1   | 76.16(5)   |

|                                                                 |            |                     |           |
|-----------------------------------------------------------------|------------|---------------------|-----------|
| O(5)–Cd(1)–O(4)#2                                               | 80.20(6)   | O(1)#1–Cd(1)–O(4)#2 | 97.87(6)  |
| N(4)–Cd(1)–O(4)#2                                               | 87.65(6)   | O(3)#2–Cd(1)–O(4)#2 | 53.80(6)  |
| N(1)–Cd(1)–O(4)#2                                               | 158.49(6)  | O(2)#1–Cd(1)–O(4)#2 | 125.21(5) |
| N(2)–C(6)–N(3)                                                  | 111.33(16) |                     |           |
| #1: $-x + 1, y + 1/2, -z + 3/2$ ; #2: $-x, y + 1/2, -z + 3/2$ . |            |                     |           |

Table S2 Hydrogen bond distances (Å) and angles (°) in **2b**, **H<sub>2</sub>L<sup>1</sup>**, **H<sub>2</sub>L<sup>2</sup>** and CPs **3–6**.

| D–H•••A                                                                                                                                                        | D–H  | H•••A | D•••A    | D–H•••A |
|----------------------------------------------------------------------------------------------------------------------------------------------------------------|------|-------|----------|---------|
| <b>2b</b>                                                                                                                                                      |      |       |          |         |
| C(3)–H(3A)•••O(3)i                                                                                                                                             | 0.93 | 2.43  | 3.258(3) | 148     |
| Symmetry code: i: $x - 1/2, y, -z + 3/2$ .                                                                                                                     |      |       |          |         |
| <b>H<sub>2</sub>L<sup>1</sup></b>                                                                                                                              |      |       |          |         |
| O(2)–H(2)•••O(4)i                                                                                                                                              | 0.82 | 1.81  | 2.608(6) | 164     |
| O(3)–H(3)•••O(1)ii                                                                                                                                             | 0.82 | 1.88  | 2.667(5) | 161     |
| C(1)–H(1B)•••O(1)                                                                                                                                              | 0.96 | 2.51  | 3.108(6) | 120     |
| C(5)–H(5)•••N(4)iii                                                                                                                                            | 0.93 | 2.48  | 3.410(6) | 178     |
| C(7)–H(7B)•••O(4)                                                                                                                                              | 0.96 | 2.44  | 3.076(6) | 123     |
| i: $1/2 + x, -1/2 - y, z$ ; ii: $-1/2 + x, -1/2 - y, z$ ; iii: $1/2 - x, -1/2 + y, 1/2 + z$ .                                                                  |      |       |          |         |
| <b>H<sub>2</sub>L<sup>2</sup></b>                                                                                                                              |      |       |          |         |
| O(1)–H(1)•••O(4)i                                                                                                                                              | 0.82 | 1.84  | 2.630(3) | 162     |
| O(3)–H(3)•••O(2)ii                                                                                                                                             | 0.82 | 1.82  | 2.636(3) | 171     |
| C(7)–H(7B)•••O(4)                                                                                                                                              | 0.96 | 2.56  | 3.093(4) | 115     |
| C(5)–H(5)•••N(4)iii                                                                                                                                            | 0.93 | 2.61  | 3.510(4) | 164     |
| C(6)–H(6B)•••N(1)iv                                                                                                                                            | 0.97 | 2.61  | 3.368(3) | 135     |
| C(11)–H(11)•••O(2)v                                                                                                                                            | 0.93 | 2.43  | 3.350(4) | 168     |
| i: $-1/2 + x, 3/2 - y, -1/2 + z$ ; ii: $1/2 + x, 3/2 - y, 1/2 + z$ ; iii: $1/2 - x, -1/2 + y, 1/2 - z$ ; iv: $x, -1 + y, z$ ; v: $1/2 - x, 1/2 + y, 1/2 - z$ . |      |       |          |         |
| <b>3a</b>                                                                                                                                                      |      |       |          |         |
| O(6)–H(6X)•••O(3)i                                                                                                                                             | 0.89 | 1.81  | 2.693(3) | 172     |
| O(6)–H(6Y)•••O(1)ii                                                                                                                                            | 0.94 | 1.85  | 2.740(3) | 158     |
| C(11)–H(11)•••O(1)iii                                                                                                                                          | 0.93 | 2.52  | 3.414(3) | 162     |
| C(1)–H(1B)•••O(2)                                                                                                                                              | 0.96 | 2.50  | 3.131(4) | 124     |
| C(7)–H(7B)•••O(4)                                                                                                                                              | 0.96 | 2.38  | 3.052(3) | 127     |
| i: $-1/2 + x, 5/2 - y, -z$ ; ii: $-1/2 + x, 3/2 - y, -z$ ; iii: $x, 1 + y, z$ .                                                                                |      |       |          |         |
| <b>3b</b>                                                                                                                                                      |      |       |          |         |
| O(6)–H(6X)•••O(3)i                                                                                                                                             | 0.96 | 2.25  | 2.764(6) | 113     |
| O(6)–H(6Y)•••O(1)ii                                                                                                                                            | 0.96 | 2.31  | 2.710(6) | 104     |
| C(1)–H(1B)•••O(2)                                                                                                                                              | 0.96 | 2.53  | 3.203(7) | 127     |
| C(11)–H(11)•••O(1)iii                                                                                                                                          | 0.93 | 2.57  | 3.470(7) | 163     |
| C(12)–H(12)•••O(4)iv                                                                                                                                           | 0.93 | 2.60  | 3.090(6) | 114     |
| i: $-1/2 + x, -1/2 - y, -z$ ; ii: $-1/2 + x, 1/2 - y, -z$ ; iii: $x, -1 + y, z$ ; iv: $-1 + x, 1 + y, z$ .                                                     |      |       |          |         |



| <b>4</b>                                                                                                                                                         |      |      |           |     |
|------------------------------------------------------------------------------------------------------------------------------------------------------------------|------|------|-----------|-----|
| O(4)–H(4X)•••O(2)i                                                                                                                                               | 0.88 | 1.78 | 2.646(5)  | 169 |
| O(3)–H(3X)•••O(2)ii                                                                                                                                              | 0.83 | 1.96 | 2.760(5)  | 161 |
| C(6)–H(6B)•••O(5)iii                                                                                                                                             | 0.97 | 2.44 | 3.324(14) | 152 |
| C(6)–H(6B)•••O(5)iv                                                                                                                                              | 0.97 | 2.44 | 3.324(14) | 152 |
| O(5)–H(5Y)•••O(3)v                                                                                                                                               | 0.88 | 2.25 | 3.084(14) | 158 |
| i: $x, -y + 3/2, z$ ; ii: $x + 1/2, -y + 3/2, -z + 1/2$ ; iii: $x - 1/2, y + 1, -z + 1/2$ ; iv: $x - 1/2, -y + 3/2, -z + 1/2$ ; v: $-x + 1/2, -y + 1, z - 1/2$ . |      |      |           |     |
| <b>5</b>                                                                                                                                                         |      |      |           |     |
| O(5)–H(5D)•••O(6)                                                                                                                                                | 0.82 | 1.91 | 2.714(3)  | 167 |
| O(5)–H(5C)•••O(3)i                                                                                                                                               | 0.82 | 2.00 | 2.738(3)  | 150 |
| O(6)–H(6C)•••O(4)ii                                                                                                                                              | 0.82 | 2.32 | 2.966(3)  | 136 |
| O(6)–H(6D)•••O(3)iii                                                                                                                                             | 0.82 | 2.09 | 2.868(3)  | 157 |
| C(6)–H(6A)•••O(6)iv                                                                                                                                              | 0.97 | 2.54 | 3.419(4)  | 151 |
| C(6)–H(6B)•••O(4)v                                                                                                                                               | 0.97 | 2.53 | 3.139(4)  | 120 |
| C(11)–H(11)•••O(3)i                                                                                                                                              | 0.93 | 2.56 | 3.310(4)  | 138 |
| i: $1 - x, 1/2 + y, 5/2 - z$ ; ii: $1/2 - x, 1 - y, -1/2 + z$ ; iii: $-1/2 + x, 1/2 - y, 2 - z$ ; iv: $1 + x, y, z$ ; v: $3/2 - x, 1 - y, -1/2 + z$ .            |      |      |           |     |
| <b>6</b>                                                                                                                                                         |      |      |           |     |
| O(8)–H(8X)•••O(6)                                                                                                                                                | 0.89 | 1.81 | 2.696(3)  | 171 |
| O(5)–H(5Y)•••O(8)                                                                                                                                                | 0.82 | 1.98 | 2.790(3)  | 168 |
| O(6)–H(6X)•••O(2)                                                                                                                                                | 0.86 | 1.97 | 2.830(2)  | 172 |
| O(5)–H(5X)•••O(7)i                                                                                                                                               | 0.82 | 1.93 | 2.755(3)  | 178 |
| O(6)–H(6Y)•••O(1)ii                                                                                                                                              | 0.84 | 1.93 | 2.768(2)  | 177 |
| O(7)–H(7X)•••O(3)iii                                                                                                                                             | 0.82 | 2.07 | 2.795(3)  | 148 |
| O(7)–H(7Y)•••O(4)iv                                                                                                                                              | 0.82 | 2.43 | 3.092(3)  | 139 |
| C(1)–H(1C)•••O(2)                                                                                                                                                | 0.96 | 2.50 | 3.098(3)  | 121 |
| C(7)–H(7C)•••O(4)                                                                                                                                                | 0.96 | 2.49 | 3.095(3)  | 121 |
| i: $1 - x, 1 - y, 2 - z$ ; ii: $x, 1/2 - y, 1/2 + z$ ; iii: $1 + x, y, z$ ; iv: $1 + x, 1/2 - y, 1/2 + z$ .                                                      |      |      |           |     |
